# Supplementary material for: Clouds and precipitation in the initial phase of marine cold-air outbreaks as observed by airborne remote sensing
Source: Copernicus journal article supplement (doi:10.5194/acp-24-12823-2024), 2024-11-19
Supplement: Supplementary file 1 [file acp-24-12823-2024-supplement.pdf]

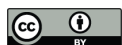

*Supplement of*

## **Clouds and precipitation in the initial phase of marine cold-air outbreaks as observed by airborne remote sensing**

**Imke Schirmacher et al.**

*Correspondence to:* Imke Schirmacher ([imke.schirmacher@uni-koeln.de](mailto:imke.schirmacher@uni-koeln.de))

The copyright of individual parts of the supplement might differ from the article licence.

# 1 Supplementary figures

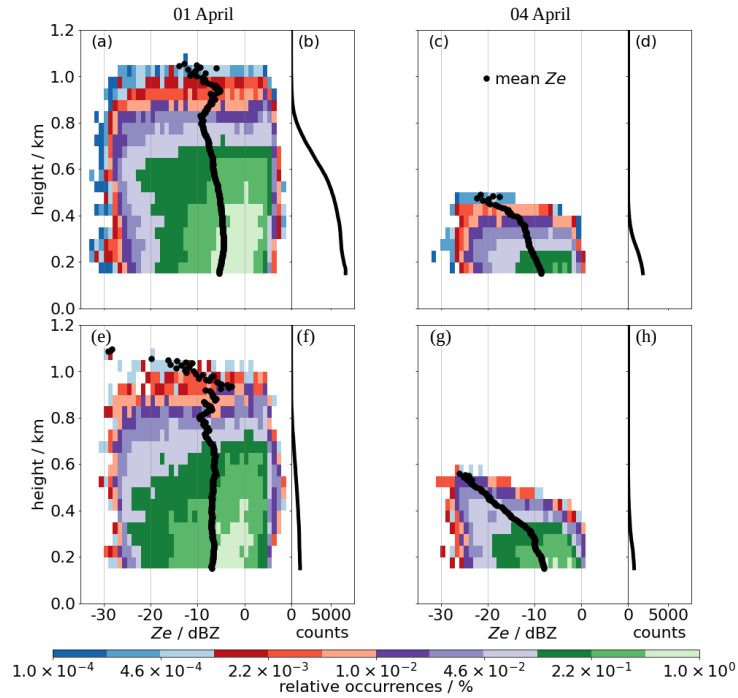

Fig. S1: Contoured frequency by altitude diagram (left) and absolute counts per altitude (right) for liquid-topped (first row) and non-liquid-topped (second row) radar reflectivity ( $Z_e$ ) profiles obtained by MiRAC in the 'cloud street' regime on 01 April (a, b, e, f) and 04 April (c, d, g, h). Moreover, each mean  $Z_e$  profile (black dots) is displayed. The total amount of liquid-topped and non-liquid-topped profiles is 8979 and 1951, respectively.

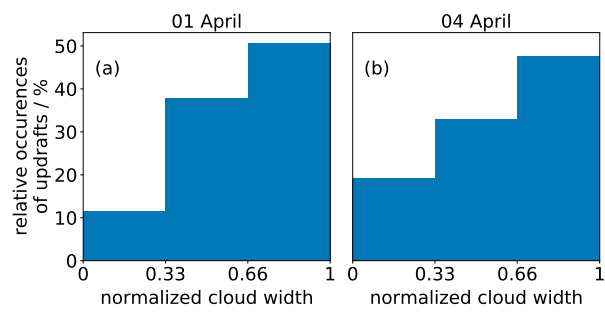

Fig. S2: Relative occurrence of updrafts ( $\max Z_{e_{0.7}}$ ) within all cloud streets that consist of at least 5 radar profiles on 01 April (a) and 04 April (b). Here, 0 is the boundary and 1 is the center of the cloud.
